# Supplementary material
Source: PubMed Central journal article supplement (PMC2981702)
Supplement: NIHMS244114-supplement-1_si_001.pdf [file NIHMS244114-supplement-1_si_001.pdf]

## *Supporting Information*

# **Paraoxon-Induced Protein Expression Changes to SH-SY5Y Cells**

John M. Prins<sup>†</sup>, Kathleen M. George<sup>†</sup> and Charles M. Thompson<sup>†§\*</sup>

*<sup>†</sup>The Center for Structural and Functional Neuroscience,  
Department of Biomedical and Pharmaceutical Sciences,  
The University of Montana, Missoula MT 59812*

*and*

*<sup>§</sup>ATERIS Technologies LLC  
901 N Orange Street, Missoula MT 59802*

**Supplemental Figure S-1:** Efficiency of the Calbiochem Subproteome extraction kit on SH-SY5Y cells. A) Coomassie stained 1-D SDS PAGE gel demonstrates changes in protein bands in different cellular fraction and % of protein in each fraction as determined by Bradford protein assay. B) Results from the western blot analysis demonstrates that the sub-proteome extraction can efficiently isolate proteins according to their localization within the cell. a) cytosolic protein phosphatase (PP2A/C) is primarily a cytosolic protein and was largely restricted to the cytosolic fraction. b) Synaptophysin is a membrane bound protein and was found in the membrane fraction. c) Neurofilament medium and was isolated in the cytosolic fraction. Map Kinase (ERK) is an enzyme that translocates from the nucleus to the membrane and was found in all fractions.

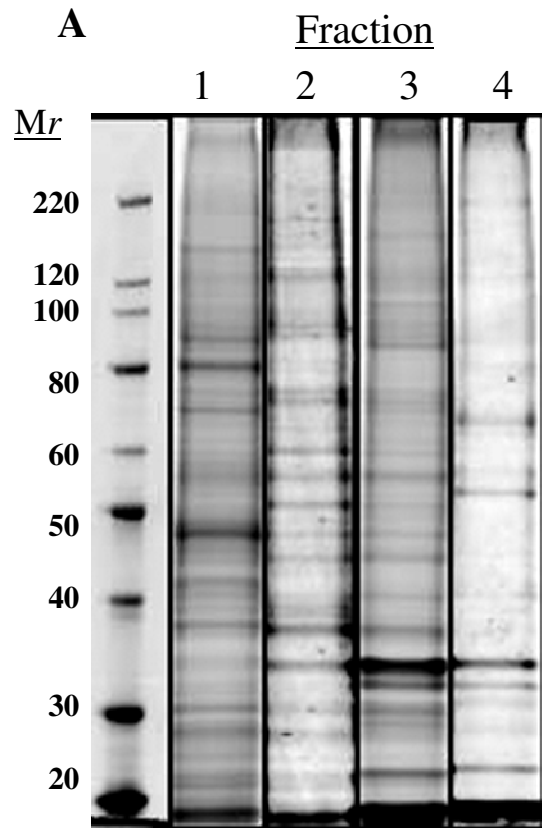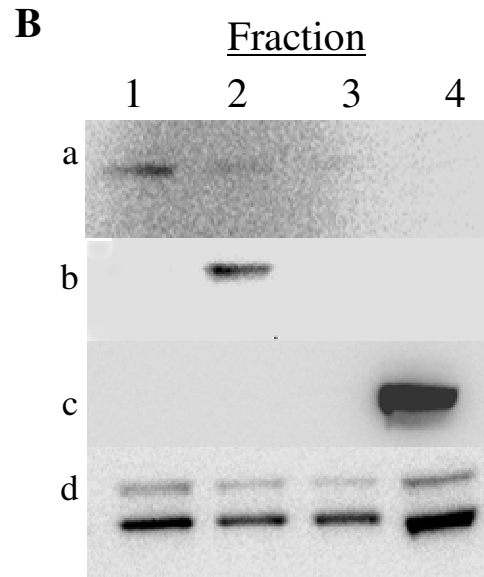

- a) Cytosolic protein phosphatase (2A/C)
- b) Synaptophysin
- c) Neurofilament
- d) Map Kinase

Protein Concentration %

- 1. 34%
- 2. 36%
- 3. 16%
- 4. 14%

**Supplemental Figure S-2:** Western blot analysis of SH-SY5Y cells exposed to A) 2 $\mu$ M paraoxon and B) 20 $\mu$ M paraoxon for 0-72 hours using antibodies against ATP synthase  $\beta$ -subunit, hnRNP c1/c2, HSP 90 and GAPDH followed by appropriate HRP-conjugated secondary antibodies. Shown above the graphs are examples of blots developed by enhanced chemiluminescence following incubation with antibodies against ATP synthase  $\beta$ -subunit, hnRNP c1/c2, and HSP 90, 30 $\mu$ g of total protein were loaded in each sample well. Band density measured for ATP synthase  $\beta$ -subunit, hnRNP c1/c2, and HSP 90 was normalized to GAPDH prior to analysis. Significance determined by one-way ANOVA followed by Dunnet's post-hoc test ( $p < 0.05$ ;  $n = 3$ ).

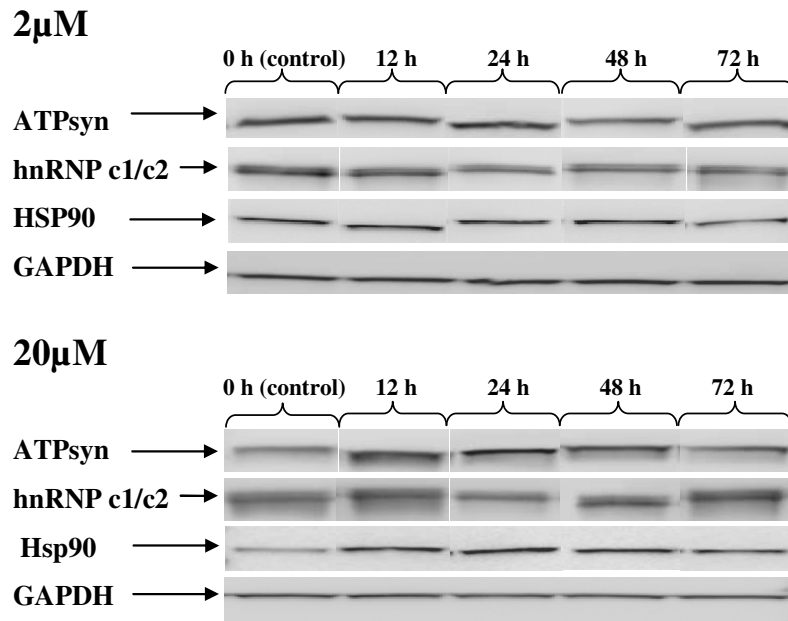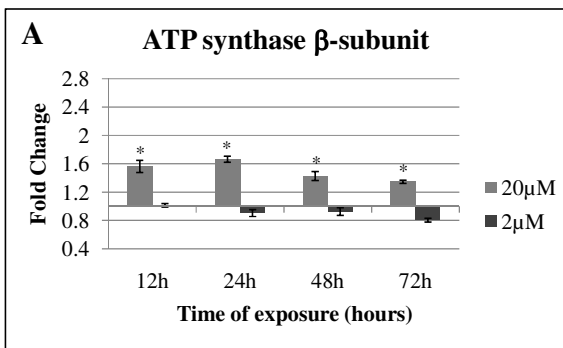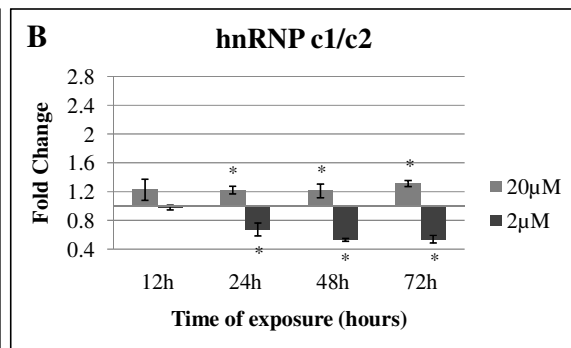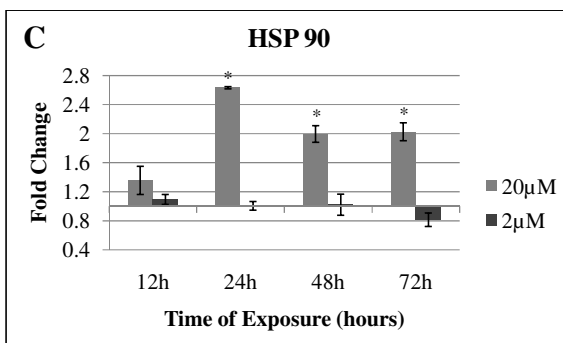

**Supplemental Figure S-3:**

20  $\mu$ M paraoxon does not cause cytotoxicity SH-SY5Y cells 48 hours post-exposure. After 48 hours, cells were trypsinized and counted with trypan blue to quantitate cytotoxicity. Shown is percent dead in triplicate cultures with at least 100 cells counted/sample. Unpaired, two-tailed t-test indicated that the values for control and paraoxon-exposed were not significantly different.

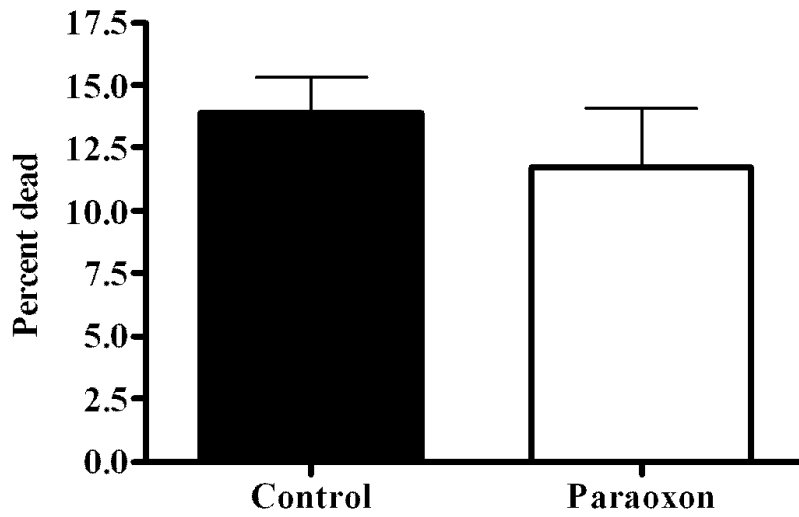

**Table S-3. List of proteins found in sub-cellular fractions**

**Cytosolic Fraction**

| Match                                       | Mascot Score | Protein Name                                                           | Sequence Coverage | Species     | Subcellular Location | Theoretical Mr/pI                                                           | Calculated Mr/pI                    | Fold Change |
|---------------------------------------------|--------------|------------------------------------------------------------------------|-------------------|-------------|----------------------|-----------------------------------------------------------------------------|-------------------------------------|-------------|
| TPM4_HUMAN                                  | 76           | Tropomyosin alpha-4 chain (Tropomyosin-4) (TM30p1)                     | 27%               | Homo Sapien | Cytosolic            | <b>Mr:</b> 28373<br><b>pI:</b> 4.67                                         | <b>Mr:</b> 32093<br><b>pI:</b> 4.86 | 2.5         |
| AAH21092                                    | 73           | zinc finger, FYVE domain containing 19 (BC021092 NID)                  | 24%               | Homo Sapien | Cytosolic            | <b>Mr:</b> 36365<br><b>pI:</b> 5.29                                         | <b>Mr:</b> 37170<br><b>pI:</b> 4.88 | 2.6         |
| GDIR_HUMAN                                  | 71           | Rho GDP-dissociation inhibitor 1 (Rho GDI 1) (Rho-GDI alpha)           | 28%               | Homo Sapien | Cytosolic            | <b>Mr:</b> 23062<br><b>pI:</b> 5.03                                         | <b>Mr:</b> 29470<br><b>pI:</b> 5.01 | 1.5         |
| HHHU84                                      | 89           | heat shock protein 90-beta                                             | 22%               | Homo Sapien | Cytosolic            | <b>Mr:</b> 83242<br><b>pI:</b> 4.97                                         | <b>Mr:</b> 84415<br><b>pI:</b> 5.07 | -1.7        |
| AAH00987                                    | 104          | heat shock protein 90kDa alpha (cytosolic)                             | 30%               | Homo Sapien | Cytosolic            | <b>Mr:</b> 84350<br><b>pI:</b> 5.10                                         | <b>Mr:</b> 85430<br><b>pI:</b> 4.95 | -1.3        |
| Mixture 1:<br>Q96IH1_HUMAN;<br>Q3ZCU9_HUMAN | 130          | FSCN1 protein;<br>STIP1 protein                                        | 18%, 18%          | Homo Sapien | Cytosolic            | <b>Mr:</b> 55101<br><b>pI:</b> 6.83;<br><b>Mr:</b> 68003<br><b>pI:</b> 7.81 | <b>Mr:</b> 55975<br><b>pI:</b> 7.05 | -1.5        |
| ENOA_HUMAN                                  | 80           | Alpha-enolase (2-phospho-D-glycerate hydro-lyase) (Non-neural enolase) | 26%               | Homo Sapien | Cytosolic            | <b>Mr:</b> 47008<br><b>pI:</b> 6.99                                         | <b>Mr:</b> 57339<br><b>pI:</b> 7.84 | -2.3        |

## Membrane Fraction

| Match        | Mascot Score | Protein Name                                                                       | Sequence Coverage | Species     | Subcellular Location | Theoretical Mr/pI                   | Calculated Mr/pI                    | Fold Change |
|--------------|--------------|------------------------------------------------------------------------------------|-------------------|-------------|----------------------|-------------------------------------|-------------------------------------|-------------|
| AAH89438     | 89           | heterogeneous nuclear ribonucleoprotein C (C1/C2)                                  | 38%               | Homo Sapien | Membrane             | <b>Mr:</b> 27804<br><b>pI:</b> 4.55 | <b>Mr:</b> 37775<br><b>pI:</b> 4.97 | 2.8         |
| AAH08364     | 113          | heterogeneous nuclear ribonucleoprotein C (C1/C2),                                 | 38%               | Homo Sapien | Membrane             | <b>Mr:</b> 32374<br><b>pI:</b> 5.00 | <b>Mr:</b> 38828<br><b>pI:</b> 4.98 | 2.8         |
| AAH12854     | 116          | actin, beta                                                                        | 38%               | Homo Sapien | Membrane             | <b>Mr:</b> 40194<br><b>pI:</b> 5.55 | <b>Mr:</b> 42084<br><b>pI:</b> 5.41 | 1.7         |
| A33370       | 211          | H <sup>+</sup> -transporting two-sector ATPase beta chain precursor, mitochondrial | 51%               | Homo Sapien | Membrane             | <b>Mr:</b> 56525<br><b>pI:</b> 5.26 | <b>Mr:</b> 48974<br><b>pI:</b> 5.04 | -3          |
| A26885       | 93           | heterogeneous nuclear ribonucleoprotein C                                          | 37%               | Homo Sapien | Membrane             | <b>Mr:</b> 31947<br><b>pI:</b> 5.10 | <b>Mr:</b> 41614<br><b>pI:</b> 4.04 | 1.6         |
| Q53FG3_HUMAN | 80           | Interleukin enhancer binding factor 2 variant (Fragment)                           | 30%               | Homo Sapien | Membrane             | <b>Mr:</b> 43021<br><b>pI:</b> 5.19 | <b>Mr:</b> 44445<br><b>pI:</b> 5.59 | 2.1         |
| AAH12854     | 74           | actin, beta                                                                        | 29%               | Homo Sapien | Membrane             | <b>Mr:</b> 40194<br><b>pI:</b> 5.55 | <b>Mr:</b> 42458<br><b>pI:</b> 5.79 | -3.2        |
| S62767       | 122          | translation elongation factor EF-Tu precursor                                      | 35%               | Homo Sapien | Membrane             | <b>Mr:</b> 49509<br><b>pI:</b> 7.70 | <b>Mr:</b> 47300<br><b>pI:</b> 7.70 | 1.5         |

### Nuclear Fraction

| Match       | Mascot Score | Protein Name                  | Sequence Coverage | Species     | Subcellular Location | Theoretical Mr/pI                    | Calculated Mr/pI                    | Fold Change |
|-------------|--------------|-------------------------------|-------------------|-------------|----------------------|--------------------------------------|-------------------------------------|-------------|
| I52690      | 76           | prohibitin                    | 30%               | Homo Sapien | Nuclear              | <b>Mr:</b> 29786<br><b>pI:</b> 5.57  | <b>Mr:</b> 31765<br><b>pI:</b> 5.80 | -1.6        |
| AAA63192    | 70           | histone H2B.1 (HUMHISH2BANID) | 53%               | Homo Sapien | Nuclear              | <b>Mr:</b> 11324<br><b>pI:</b> 10.14 | <b>Mr:</b> 13983<br><b>pI:</b> 9.85 | -3.3        |
| H2A1H_HUMAN | 69           | Histone H2A type 1-H          | 33%               | Homo Sapien | Nuclear              | <b>Mr:</b> 13767<br><b>pI:</b> 10.88 | <b>Mr:</b> 12120<br><b>pI:</b> 9.46 | -2.2        |

### Cytoskeletal Fraction

| Match    | Mascot Score | Protein Name | Sequence Coverage | Species     | Subcellular Location | Theoretical Mr/pI                   | Calculated Mr/pI                    | Fold Change |
|----------|--------------|--------------|-------------------|-------------|----------------------|-------------------------------------|-------------------------------------|-------------|
| AAH06551 | 77           | lamin B2     | 24%               | Homo Sapien | Cytoskeletal         | <b>Mr:</b> 67647<br><b>pI:</b> 5.29 | <b>Mr:</b> 67443<br><b>pI:</b> 5.51 | 1.4         |
